# Supplementary material for: The interaction of S100A16 and GRP78 actives endoplasmic reticulum stress-mediated through the IRE1α/XBP1 pathway in renal tubulointerstitial fibrosis
Source: PubMed Central journal article supplement (PMC8514525; doi:10.1038/s41419-021-04249-8), 2021-10-13

## Supplementary Data

**Title:** The interaction of S100A16 and GRP78 activates endoplasmic reticulum stress mediated through the IRE1 $\alpha$ /XBP1 pathway in renal tubulointerstitial fibrosis

**Authors:** Runbing Jin<sup>1#</sup>, Anran Zhao<sup>1#</sup>, Shuying Han<sup>1</sup>, Dan Zhang<sup>1</sup>, Hui Sun<sup>1</sup>, Min Li<sup>2</sup>, Dongming Su<sup>2</sup> and Xiubin Liang<sup>1,3,\*</sup>

**Figure S1. a.** The mRNA levels of S100A16 and GRP78 determined by real-time PCR in HK-2 cells treated with TGF- $\beta$ 1. **b.** The expressions of S100A16 and GRP78 were higher in S100A16<sup>Tg</sup> kidneys than in wildtype kidneys. Immunohistochemical staining of S100A16 and GRP78 in the sham, S100A16<sup>Tg</sup> (sham), kidney-obstructed UUO, and S100A16<sup>Tg</sup> (kidney-obstructed UUO) mice. Scale bar =100  $\mu$ m. **c.** Overexpression of S100A16 increased the protein expression levels of p-PERK/PERK, ATF6, and CHOP.

**Figure S1**

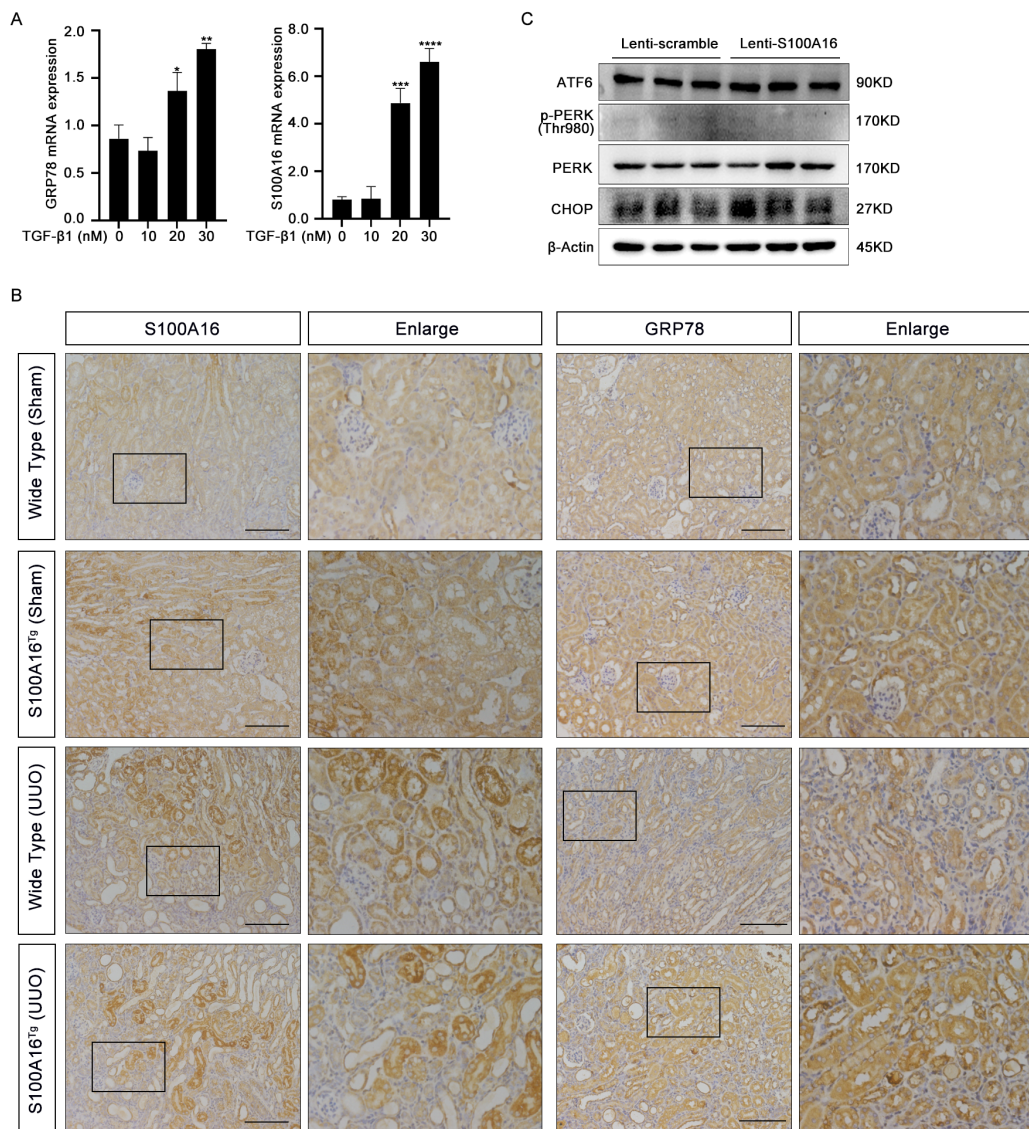

**Figure S2. a.** Intracellular calcium concentrations determined with fluorescent the  $Ca^{2+}$  indicator probe Rhod-2 AM in normal and S100A16 overexpressing HK-2 cells treated with BAPTA-AM (10  $\mu$ M). \* $P < 0.05$ , \*\* $P < 0.01$ , \*\*\* $P < 0.001$ . **b.** The mRNA levels of S100A16 and GRP78 determined by real-time PCR after BAPTA-AM treatment of Lenti-scramble and S100A16 overexpressing HK-2 cells.

**Figure S2**

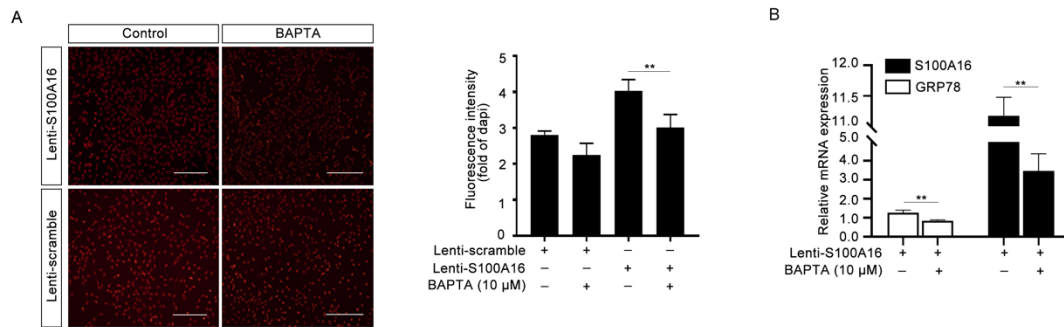

Supplement: 41419_2021_4249_MOESM1_ESM.pdf [file 41419_2021_4249_MOESM1_ESM.pdf]
